# Supplementary material for: The association between community-associated Staphylococcus aureus colonization and disease: a meta-analysis
Source: PubMed Central journal article supplement (PMC5822478; doi:10.1186/s12879-018-2990-3), 2018-02-21

Funnel plot with pseudo 95% confidence limits

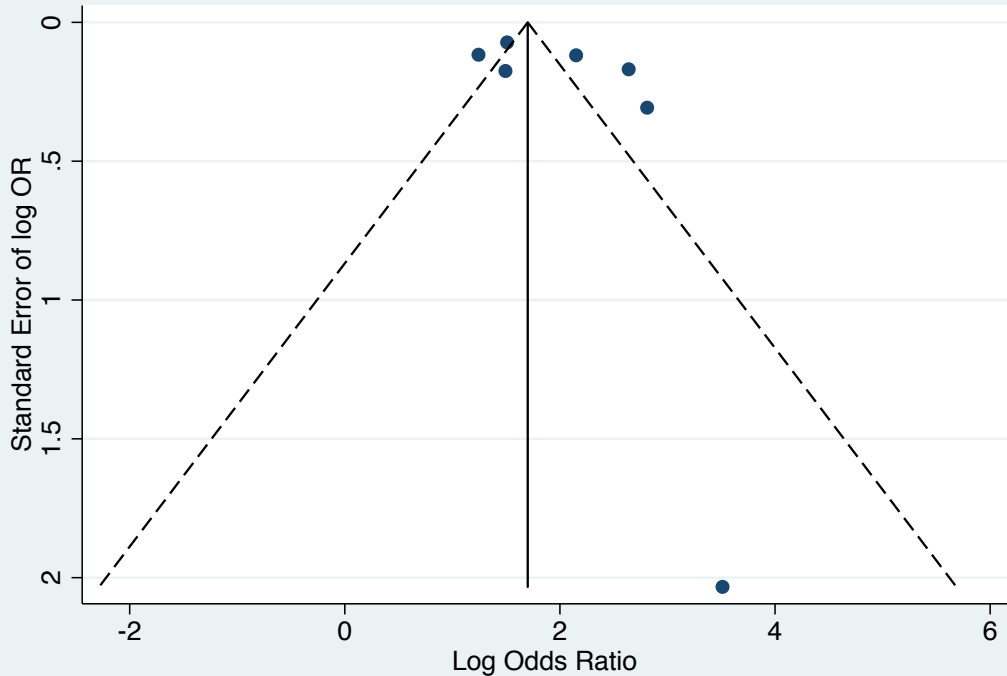

Supplement: 12879_2018_2990_MOESM4_ESM.pdf [file 12879_2018_2990_MOESM4_ESM.pdf]
