# Supplementary material for: The association between community-associated Staphylococcus aureus colonization and disease: a meta-analysis
Source: Springer Nature journal article supplement (doi:10.1186/s12879-018-2990-3), 2018-02-21
Supplement: MOESM2 [file 15481146]

**Additional file 2** – Characteristics of studies selected for inclusion in meta-analysis

| Article                              | Study design       | Location(s) | Study period   | Study subjects (N) | Study Population                                                                             | Study Setting                                                                                                   | Disease type(s) reported                  | <i>S. aureus</i> type subgroup* |
|--------------------------------------|--------------------|-------------|----------------|--------------------|----------------------------------------------------------------------------------------------|-----------------------------------------------------------------------------------------------------------------|-------------------------------------------|---------------------------------|
| Nguyen et al., 1999 <sup>32</sup>    | Prospective cohort | USA         | Not reported   | 201                | HIV-infected outpatients (adults)                                                            | Outpatient clinic at Veterans Affairs Medical Centers (Michigan, Massachusetts, Pennsylvania)                   | SSTI, bacteremia, endocarditis, pneumonia | SA                              |
| Gordon et al., 2005 <sup>30</sup>    | Prospective cohort | USA         | 1/2001-12/2001 | 75                 | HIV-infected patients with a history of drug use participating in Project Samaritan (adults) | Residential drug treatment facility (Bronx, NY)                                                                 | SSTI, bacteremia                          | SA                              |
| Ellis et al., 2009 <sup>21</sup>     | Prospective cohort | USA         | 1/2005-12/2005 | 3066               | U.S. Army personnel training to be combat medics (adults)                                    | U.S. army post Fort Sam Houston (San Antonio, TX)                                                               | SSTI                                      | MRSA                            |
| Fritz et al., 2009 <sup>24</sup>     | Prospective cohort | USA         | 10/2005-6/2006 | 534                | Pediatric outpatients at well and sick visits (children age 0-18)                            | Catchment area of Washington University Pediatric and Adolescent Ambulatory Research Consortium (WA)            | SSTI                                      | SA, MRSA, MSSA                  |
| Miller et al., 2009 <sup>22</sup>    | Cross-sectional    | USA         | 2/2004-6/2006  | 914                | Community households, selected by random digit dialing (adults and children >1 year of age)  | Catchment area of Columbia University Medical Center (Manhattan, NY)                                            | SSTI                                      | SA                              |
| Shet et al., 2009 <sup>29</sup>      | Prospective cohort | USA         | 2005-2006      | 107                | HIV-1 infected MSM outpatients w/ no evidence of immune suppression (adults)                 | Outpatient clinic of Aaron Diamond AIDS Research Center Clinical Program at Rockefeller Hospital (New York, NY) | SSTI                                      | MRSA                            |
| Szumowski et al., 2009 <sup>23</sup> | Prospective cohort | USA         | 10/2005-1/2007 | 795                | Outpatients (adults); 243/795 HIV-infected                                                   | Outpatient clinics of Fenway Community Health (Boston, MA)                                                      | SSTI                                      | MRSA                            |
| Lo et al., 2010 <sup>28</sup>        | Cross-sectional    | Taiwan      | 2005-2006      | 153                | Pediatric outpatients with atopic dermatitis (<= 14 years old)                               | Pediatric department of Tri-Service General Hospital (Taipei)                                                   | SSTI                                      | SA, MRSA, MSSA                  |
| Maree et al., 2010 <sup>27</sup>     | Case-control       | USA         | 10/2006-1/2007 | 162                | Male prison inmates (adults)                                                                 | County Sheriff's Department jail facilities (Los Angeles, CA)                                                   | SSTI                                      | SA, MRSA, MSSA                  |
| Oliva et al., 2013 <sup>31</sup>     | Cross-sectional    | Italy       | 1/2008-6/2008  | 63                 | HIV-infected outpatients (adults)                                                            | Outpatient clinic at the Department of Infectious and Tropical Diseases of Sapienza University of Rome (Rome)   | SSTI                                      | MSSA                            |
| Peters et al., 2013 <sup>25</sup>    | Prospective cohort | USA         | 9/2007-4/2008  | 600                | HIV-infected, 53% MSM (adults > 18 years of age)                                             | Veterans Affairs Medical Center HIV Clinic (Atlanta, GA)                                                        | SSTI, bacteremia, pneumonia               | MRSA                            |
| Miko et al., 2015 <sup>26</sup>      | Case-control       | USA         | 3/2011-1/2013  | 328                | Prison inmates (>= 16 years of age)                                                          | Maximum security prisons: Sing Sing Correctional Facility, Bedford Hills Correctional Facility (NY)             | SSTI                                      | SA                              |

SSTI = skin and soft tissue infection, MSM = men who have sex with men

\* MRSA = methicillin-resistant *Staphylococcus aureus*, MSSA = methicillin-susceptible *S. aureus*, SA = *S. aureus*
