# Supplementary material for: The association between community-associated Staphylococcus aureus colonization and disease: a meta-analysis
Source: Springer Nature journal article supplement (doi:10.1186/s12879-018-2990-3), 2018-02-21

Funnel plot with pseudo 95% confidence limits

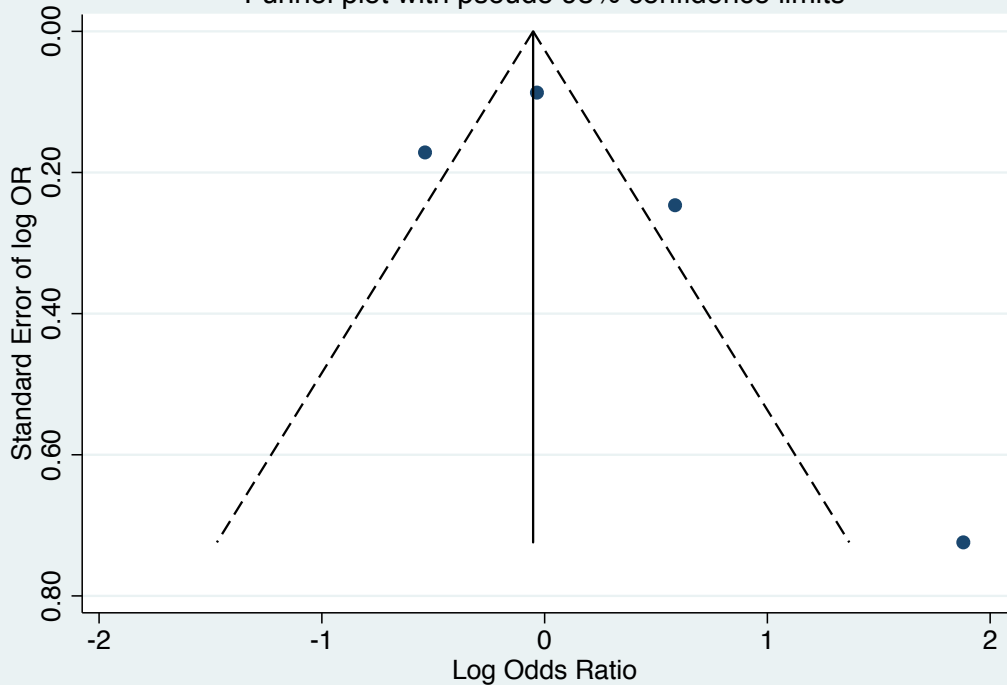

Supplement: MOESM5 [file 15481146]
